# Supplementary material for: Automated, high-dimensional evaluation of physiological aging and resilience in outbred mice
Source: eLife. 2022 Apr 11;11:e72664. doi: 10.7554/eLife.72664 (PMC9000950; doi:10.7554/eLife.72664)
Supplement: Supplementary file 1. — Rows are each of the 309 per-run features, columns are the KT coefficient, p-value with respect to age, Bonferroni-adjusted p-value, and a binary TRUE/FALSE significance column to indicate whether the adjusted p-value is less than 0.05. Percent of features with a significant age association is indicated on the right side of the table. [file elife-72664-supp1.xlsx]

## Sheet: Sheet1
Feature	KT Coefficient	Pvalue	Corrected Pvalue	Significant		Total significant:	244
AllMeters	0.08697	7.20549e-13	2.27693e-10	TRUE		% Significant:	0.789644
BodyMass	0.177286	2.25191e-48	7.11605e-46	TRUE
Food	-0.08448	7.0619e-12	2.23156e-09	TRUE
KCal_hr	-0.240314	2.39542e-87	7.56952e-85	TRUE
PedMeters	0.056838	2.90904e-06	0.000919256	TRUE
PedSpeed	-0.098902	3.35164e-16	1.05912e-13	TRUE
RQ	-0.094934	9.51395e-15	3.00641e-12	TRUE
VCO2	-0.277899	5.30992e-116	1.67794e-113	TRUE
VH2O	-0.193266	1.74999e-53	5.52996e-51	TRUE
VO2	-0.216574	2.6959e-71	8.51905e-69	TRUE
Water	-0.112731	2.26455e-20	7.15596e-18	TRUE
WheelMeters	-0.263805	1.66649e-83	5.26611e-81	TRUE
WheelSpeed	-0.161012	3.0474e-40	9.62977e-38	TRUE
XBreak	0.042601	0.000461564	0.145854	FALSE
YBreak	0.190191	4.1976e-55	1.32644e-52	TRUE
ZBreak	0.01178	0.344601	108.894	FALSE
REST occupancy	0.074605	7.58032e-10	2.39538e-07	TRUE
SLEEP occupancy	0.026318	0.0302983	9.57426	FALSE
ACTIVE occupancy	-0.156917	4.13715e-38	1.30734e-35	TRUE
RUN occupancy	-0.286897	1.66939e-123	5.27527e-121	TRUE
EAT&DRINK occupancy	0.087457	5.62093e-13	1.77621e-10	TRUE
EAT occupancy	0.120287	3.45718e-23	1.09247e-20	TRUE
AllMeters(REST)	0.174083	2.18929e-47	6.91816e-45	TRUE
AllMeters(SLEEP)	0.158782	1.49729e-37	4.73144e-35	TRUE
AllMeters(ACTIVE)	0.134434	5.25537e-28	1.6607e-25	TRUE
AllMeters(RUN)	0.019214	0.116569	36.8359	FALSE
AllMeters(EAT&DRINK)	0.063045	1.81769e-07	5.74388e-05	TRUE
AllMeters(EAT)	-0.011211	0.352126	111.272	FALSE
BodyMass(REST)	0.182699	6.22697e-52	1.96772e-49	TRUE
BodyMass(SLEEP)	0.178996	2.43943e-47	7.70859e-45	TRUE
BodyMass(ACTIVE)	0.202283	4.20169e-61	1.32773e-58	TRUE
BodyMass(RUN)	0.205914	2.36109e-63	7.46103e-61	TRUE
BodyMass(EAT&DRINK)	0.188264	1.28094e-54	4.04776e-52	TRUE
BodyMass(EAT)	0.182043	1.71468e-51	5.4184e-49	TRUE
Food(REST)	0.021175	0.0858527	27.1295	FALSE
Food(SLEEP)	0.110187	1.21187e-17	3.8295e-15	TRUE
Food(ACTIVE)	0.054989	1.24196e-05	0.0039246	TRUE
Food(RUN)	-0.053686	1.62411e-05	0.0051322	TRUE
Food(EAT&DRINK)	-0.139456	1.23685e-29	3.90845e-27	TRUE
Food(EAT)	-0.093034	4.24019e-14	1.3399e-11	TRUE
KCal_hr(REST)	-0.199394	1.64261e-61	5.19064e-59	TRUE
KCal_hr(SLEEP)	-0.231074	6.36883e-77	2.01255e-74	TRUE
KCal_hr(ACTIVE)	-0.181313	1.61683e-48	5.10918e-46	TRUE
KCal_hr(RUN)	-0.233843	1.40171e-80	4.42941e-78	TRUE
KCal_hr(EAT&DRINK)	-0.191822	1.94826e-56	6.15651e-54	TRUE
KCal_hr(EAT)	-0.208938	3.11489e-67	9.84304e-65	TRUE
PedMeters(REST)	0.132657	4.36202e-28	1.3784e-25	TRUE
PedMeters(SLEEP)	0.203269	7.32021e-60	2.31319e-57	TRUE
PedMeters(ACTIVE)	0.105103	1.59759e-17	5.0484e-15	TRUE
PedMeters(RUN)	-0.010137	0.408926	129.22	FALSE
PedMeters(EAT&DRINK)	0.058801	1.28573e-06	0.000406292	TRUE
PedMeters(EAT)	-0.006227	0.607161	191.863	FALSE
PedSpeed(REST)	0.122206	3.30748e-24	1.04516e-21	TRUE
PedSpeed(SLEEP)	0.192206	4.2586e-54	1.34572e-51	TRUE
PedSpeed(ACTIVE)	-0.093562	2.24801e-14	7.10372e-12	TRUE
PedSpeed(RUN)	-0.02934	0.0165531	5.2308	FALSE
PedSpeed(EAT&DRINK)	-0.012632	0.295894	93.5026	FALSE
PedSpeed(EAT)	-0.059101	9.34305e-07	0.00029524	TRUE
RQ(REST)	-0.067731	2.85146e-08	9.01061e-06	TRUE
RQ(SLEEP)	-0.084233	2.44247e-11	7.7182e-09	TRUE
RQ(ACTIVE)	-0.037007	0.0030036	0.949139	FALSE
RQ(RUN)	-0.014769	0.235167	74.3126	FALSE
RQ(EAT&DRINK)	-0.046862	0.000131547	0.041569	TRUE
RQ(EAT)	-0.073097	2.13653e-09	6.75145e-07	TRUE
VCO2(REST)	-0.298346	3.90887e-135	1.2352e-132	TRUE
VCO2(SLEEP)	-0.316574	1.25533e-142	3.96685e-140	TRUE
VCO2(ACTIVE)	-0.226314	3.02003e-73	9.54331e-71	TRUE
VCO2(RUN)	-0.249676	5.56907e-90	1.75983e-87	TRUE
VCO2(EAT&DRINK)	-0.272584	7.13884e-110	2.25587e-107	TRUE
VCO2(EAT)	-0.275716	9.71445e-115	3.06977e-112	TRUE
VH2O(REST)	-0.191872	2.67852e-53	8.46412e-51	TRUE
VH2O(SLEEP)	-0.162844	1.25616e-36	3.96947e-34	TRUE
VH2O(ACTIVE)	-0.15511	3.6953e-34	1.16771e-31	TRUE
VH2O(RUN)	-0.165107	1.43429e-38	4.53237e-36	TRUE
VH2O(EAT&DRINK)	-0.192119	5.78911e-53	1.82936e-50	TRUE
VH2O(EAT)	-0.191538	4.57908e-53	1.44699e-50	TRUE
VO2(REST)	-0.172953	1.00533e-46	3.17686e-44	TRUE
VO2(SLEEP)	-0.205326	2.73573e-61	8.6449e-59	TRUE
VO2(ACTIVE)	-0.168439	4.97219e-42	1.57121e-39	TRUE
VO2(RUN)	-0.232499	7.77276e-80	2.45619e-77	TRUE
VO2(EAT&DRINK)	-0.157766	8.99715e-39	2.8431e-36	TRUE
VO2(EAT)	-0.171244	9.36922e-46	2.96067e-43	TRUE
Water(REST)	0.111589	7.48686e-20	2.36585e-17	TRUE
Water(SLEEP)	0.114263	2.95399e-19	9.3346e-17	TRUE
Water(ACTIVE)	-0.001064	0.933888	295.109	FALSE
Water(RUN)	-0.093938	2.39018e-14	7.55296e-12	TRUE
Water(EAT&DRINK)	0.006121	0.615724	194.569	FALSE
Water(EAT)	-0.0715	3.63216e-09	1.14776e-06	TRUE
WheelMeters(REST)	0.060365	1.11664e-05	0.00352859	TRUE
WheelMeters(SLEEP)	0.122482	1.49358e-17	4.7197e-15	TRUE
WheelMeters(ACTIVE)	-0.186892	1.42646e-37	4.5076e-35	TRUE
WheelMeters(RUN)	-0.241537	2.79697e-62	8.83842e-60	TRUE
WheelMeters(EAT&DRINK)	0.021765	0.1089	34.4125	FALSE
WheelMeters(EAT)	0.10117	8.17655e-14	2.58379e-11	TRUE
WheelSpeed(REST)	0.119226	1.50259e-22	4.74817e-20	TRUE
WheelSpeed(SLEEP)	0.124538	2.12447e-22	6.71333e-20	TRUE
WheelSpeed(ACTIVE)	-0.137585	4.82511e-29	1.52473e-26	TRUE
WheelSpeed(RUN)	-0.154811	2.05474e-36	6.49299e-34	TRUE
WheelSpeed(EAT&DRINK)	-0.028844	0.0172919	5.46424	FALSE
WheelSpeed(EAT)	0.030824	0.0107621	3.40081	FALSE
XBreak(REST)	0.14031	3.64063e-31	1.15044e-28	TRUE
XBreak(SLEEP)	0.15258	1.82641e-34	5.77147e-32	TRUE
XBreak(ACTIVE)	0.075473	9.91676e-10	3.1337e-07	TRUE
XBreak(RUN)	0.067222	4.51583e-08	1.427e-05	TRUE
XBreak(EAT&DRINK)	-0.039845	0.00104023	0.328712	FALSE
XBreak(EAT)	-0.095404	3.2573e-15	1.02931e-12	TRUE
YBreak(REST)	0.232394	2.19003e-82	6.9205e-80	TRUE
YBreak(SLEEP)	0.237917	4.10405e-81	1.29688e-78	TRUE
YBreak(ACTIVE)	0.219906	3.04127e-71	9.61041e-69	TRUE
YBreak(RUN)	0.142321	5.22203e-31	1.65016e-28	TRUE
YBreak(EAT&DRINK)	0.134947	1.07088e-28	3.38399e-26	TRUE
YBreak(EAT)	0.113459	7.43053e-21	2.34805e-18	TRUE
ZBreak(REST)	-0.017758	0.151559	47.8926	FALSE
ZBreak(SLEEP)	-0.013167	0.302035	95.4431	FALSE
ZBreak(ACTIVE)	-0.005208	0.680779	215.126	FALSE
ZBreak(RUN)	-0.048974	0.000116805	0.0369105	TRUE
ZBreak(EAT&DRINK)	-0.00568	0.648208	204.834	FALSE
ZBreak(EAT)	0.04869	8.65911e-05	0.0273628	TRUE
sleeping num period	0.125085	3.68597e-23	1.16477e-20	TRUE
sleeping median period	-0.12182	3.3372e-22	1.05456e-19	TRUE
sleeping median interval	-0.059774	8.81912e-07	0.000278684	TRUE
sleeping max period	-0.065422	1.86268e-07	5.88608e-05	TRUE
sleeping max interval	-0.078508	1.0209e-10	3.22603e-08	TRUE
exercising num period	-0.049718	5.24145e-05	0.016563	TRUE
exercising median period	-0.241743	1.2397e-85	3.91745e-83	TRUE
exercising median interval	0.128969	2.49923e-26	7.89758e-24	TRUE
exercising max period	-0.265027	6.97488e-104	2.20406e-101	TRUE
exercising max interval	0.089404	1.64453e-13	5.1967e-11	TRUE
feeding num period	-0.102607	2.68805e-16	8.49425e-14	TRUE
feeding median period	0.229663	2.52948e-73	7.99315e-71	TRUE
feeding median interval	0.071241	1.3047e-08	4.12286e-06	TRUE
feeding max period	0.104475	5.97978e-17	1.88961e-14	TRUE
feeding max interval	-0.005988	0.631447	199.537	FALSE
AllMeters(dark)	0.108924	1.42673e-19	4.50845e-17	TRUE
AllMeters(early-dark)	0.194398	1.09753e-58	3.4682e-56	TRUE
AllMeters(early-light)	-0.140685	1.44772e-31	4.57479e-29	TRUE
AllMeters(late-dark)	0.115199	1.05238e-21	3.32553e-19	TRUE
AllMeters(late-light)	0.035642	0.00306231	0.967689	FALSE
AllMeters(light)	0.01864	0.122174	38.607	FALSE
BodyMass(dark)	0.185023	3.11985e-53	9.85873e-51	TRUE
BodyMass(early-dark)	0.182663	6.27405e-52	1.9826e-49	TRUE
BodyMass(early-light)	0.182055	1.35156e-51	4.27092e-49	TRUE
BodyMass(late-dark)	0.185877	1.00339e-53	3.1707e-51	TRUE
BodyMass(late-light)	0.18006	1.58764e-50	5.01693e-48	TRUE
BodyMass(light)	0.178661	1.43779e-49	4.5434e-47	TRUE
Food(dark)	-0.068772	1.88454e-08	5.95514e-06	TRUE
Food(early-dark)	0.031691	0.00957434	3.02549	FALSE
Food(early-light)	-0.218034	4.55312e-71	1.43879e-68	TRUE
Food(late-dark)	-0.014572	0.233525	73.7938	FALSE
Food(late-light)	-0.097805	1.28802e-15	4.07013e-13	TRUE
Food(light)	-0.080702	4.58063e-11	1.44748e-08	TRUE
KCal_hr(dark)	-0.252022	3.54389e-97	1.11987e-94	TRUE
KCal_hr(early-dark)	-0.249197	4.71211e-95	1.48903e-92	TRUE
KCal_hr(early-light)	-0.229922	3.35396e-81	1.05985e-78	TRUE
KCal_hr(late-dark)	-0.18676	3.21345e-54	1.01545e-51	TRUE
KCal_hr(late-light)	-0.170983	9.81751e-46	3.10233e-43	TRUE
KCal_hr(light)	-0.168146	4.15996e-44	1.31455e-41	TRUE
PedMeters(dark)	0.086532	7.49911e-13	2.36972e-10	TRUE
PedMeters(early-dark)	0.169497	8.33538e-45	2.63398e-42	TRUE
PedMeters(early-light)	-0.148972	5.2676e-35	1.66456e-32	TRUE
PedMeters(late-dark)	0.09261	1.67195e-14	5.28336e-12	TRUE
PedMeters(late-light)	0.010422	0.387809	122.548	FALSE
PedMeters(light)	-0.000933	0.938514	296.57	FALSE
PedSpeed(dark)	-0.116419	3.92677e-22	1.24086e-19	TRUE
PedSpeed(early-dark)	-0.049371	4.09439e-05	0.0129383	TRUE
PedSpeed(early-light)	-0.177926	1.87315e-49	5.91916e-47	TRUE
PedSpeed(late-dark)	-0.039199	0.00112619	0.355876	FALSE
PedSpeed(late-light)	-0.003269	0.785942	248.358	FALSE
PedSpeed(light)	0.040466	0.000791773	0.2502	FALSE
RQ(dark)	-0.076904	2.80206e-10	8.8545e-08	TRUE
RQ(early-dark)	-0.078153	1.4789e-10	4.67332e-08	TRUE
RQ(early-light)	-0.103317	2.35314e-17	7.43591e-15	TRUE
RQ(late-dark)	-0.055143	6.11185e-06	0.00193134	TRUE
RQ(late-light)	-0.096299	2.47168e-15	7.81051e-13	TRUE
RQ(light)	-0.084046	6.01591e-12	1.90103e-09	TRUE
VCO2(dark)	-0.25895	5.79829e-102	1.83226e-99	TRUE
VCO2(early-dark)	-0.259906	1.23259e-102	3.89497e-100	TRUE
VCO2(early-light)	-0.287003	3.03822e-125	9.60077e-123	TRUE
VCO2(late-dark)	-0.206504	1.0708e-65	3.38374e-63	TRUE
VCO2(late-light)	-0.233466	1.88151e-83	5.94557e-81	TRUE
VCO2(light)	-0.246051	3.98386e-92	1.2589e-89	TRUE
VH2O(dark)	-0.194977	5.35902e-55	1.69345e-52	TRUE
VH2O(early-dark)	-0.202487	3.57292e-59	1.12904e-56	TRUE
VH2O(early-light)	-0.182374	2.42884e-48	7.67512e-46	TRUE
VH2O(late-dark)	-0.164809	8.45124e-40	2.67059e-37	TRUE
VH2O(late-light)	-0.204268	3.30476e-60	1.04431e-57	TRUE
VH2O(light)	-0.188985	1.43761e-51	4.54286e-49	TRUE
VO2(dark)	-0.235073	1.24054e-84	3.92011e-82	TRUE
VO2(early-dark)	-0.232128	9.90477e-83	3.12991e-80	TRUE
VO2(early-light)	-0.20351	5.08508e-64	1.60689e-61	TRUE
VO2(late-dark)	-0.176204	1.91196e-48	6.04179e-46	TRUE
VO2(late-light)	-0.14546	1.41051e-33	4.45721e-31	TRUE
VO2(light)	-0.142006	5.9456e-32	1.87881e-29	TRUE
Water(dark)	-0.11129	3.76577e-20	1.18998e-17	TRUE
Water(early-dark)	-0.035205	0.003631	1.14739	FALSE
Water(early-light)	-0.197399	8.58133e-60	2.7117e-57	TRUE
Water(late-dark)	-0.065422	6.47986e-08	2.04763e-05	TRUE
Water(late-light)	-0.068003	1.92889e-08	6.0953e-06	TRUE
Water(light)	-0.051001	2.60958e-05	0.00824629	TRUE
WheelMeters(dark)	-0.264704	4.36367e-85	1.37892e-82	TRUE
WheelMeters(early-dark)	-0.256461	4.09306e-80	1.29341e-77	TRUE
WheelMeters(early-light)	-0.150764	8.10094e-29	2.5599e-26	TRUE
WheelMeters(late-dark)	-0.231701	9.81975e-66	3.10304e-63	TRUE
WheelMeters(late-light)	-0.022684	0.0936572	29.5957	FALSE
WheelMeters(light)	0.069006	3.6049e-07	0.000113915	TRUE
WheelSpeed(dark)	-0.154354	1.28754e-37	4.06863e-35	TRUE
WheelSpeed(early-dark)	-0.153979	1.91685e-37	6.05725e-35	TRUE
WheelSpeed(early-light)	-0.053136	1.02532e-05	0.00324002	TRUE
WheelSpeed(late-dark)	-0.135311	2.67452e-29	8.45149e-27	TRUE
WheelSpeed(late-light)	0.040662	0.000733954	0.23193	FALSE
WheelSpeed(light)	0.127593	4.15243e-26	1.31217e-23	TRUE
XBreak(dark)	0.078741	7.12364e-11	2.25107e-08	TRUE
XBreak(early-dark)	0.141318	1.30401e-31	4.12068e-29	TRUE
XBreak(early-light)	-0.142617	3.65087e-32	1.15367e-29	TRUE
XBreak(late-dark)	0.083636	4.41347e-12	1.39466e-09	TRUE
XBreak(late-light)	-0.022941	0.057562	18.1896	FALSE
XBreak(light)	-0.017962	0.137823	43.552	FALSE
YBreak(dark)	0.210687	4.07527e-68	1.28779e-65	TRUE
YBreak(early-dark)	0.280216	5.01383e-119	1.58437e-116	TRUE
YBreak(early-light)	-0.101091	5.85253e-17	1.8494e-14	TRUE
YBreak(late-dark)	0.2033	1.49998e-63	4.73993e-61	TRUE
YBreak(late-light)	0.084098	3.36559e-12	1.06353e-09	TRUE
YBreak(light)	0.054984	5.55849e-06	0.00175648	TRUE
ZBreak(dark)	-0.014176	0.25204	79.6445	FALSE
ZBreak(early-dark)	0.068066	3.80313e-08	1.20179e-05	TRUE
ZBreak(early-light)	-0.175087	1.9495e-45	6.16042e-43	TRUE
ZBreak(late-dark)	0.040846	0.000965496	0.305097	FALSE
ZBreak(late-light)	-0.002862	0.817121	258.21	FALSE
ZBreak(light)	0.00105	0.932532	294.68	FALSE
REST occupancy (dark)	0.202936	2.84759e-63	8.99839e-61	TRUE
REST occupancy (early-dark)	0.156047	3.39311e-38	1.07222e-35	TRUE
REST occupancy (early-light)	0.035171	0.00349133	1.10326	FALSE
REST occupancy (late-dark)	0.077972	1.00129e-10	3.16407e-08	TRUE
REST occupancy (late-light)	0.019605	0.103399	32.674	FALSE
REST occupancy (light)	0.014553	0.227687	71.9491	FALSE
SLEEP occupancy (dark)	0.084995	8.84171e-12	2.79398e-09	TRUE
SLEEP occupancy (early-dark)	0.085774	7.59228e-12	2.39916e-09	TRUE
SLEEP occupancy (early-light)	0.067737	2.23003e-08	7.04688e-06	TRUE
SLEEP occupancy (late-dark)	0.016785	0.170076	53.7442	FALSE
SLEEP occupancy (late-light)	-0.017927	0.138343	43.7165	FALSE
SLEEP occupancy (light)	-0.020263	0.0943392	29.8112	FALSE
ACTIVE occupancy (dark)	-0.169544	3.17079e-44	1.00197e-41	TRUE
ACTIVE occupancy (early-dark)	-0.133001	5.84397e-28	1.84669e-25	TRUE
ACTIVE occupancy (early-light)	-0.168111	4.5645e-40	1.44238e-37	TRUE
ACTIVE occupancy (late-dark)	-0.149212	3.76464e-34	1.18962e-31	TRUE
ACTIVE occupancy (late-light)	-0.082692	9.51223e-11	3.00586e-08	TRUE
ACTIVE occupancy (light)	-0.033602	0.0142653	4.50783	FALSE
RUN occupancy (dark)	-0.279916	1.13476e-118	3.58585e-116	TRUE
RUN occupancy (early-dark)	-0.278589	8.45769e-118	2.67263e-115	TRUE
RUN occupancy (early-light)	-0.171416	8.46869e-43	2.67611e-40	TRUE
RUN occupancy (late-dark)	-0.245618	3.383e-91	1.06903e-88	TRUE
RUN occupancy (late-light)	-0.104199	8.90785e-17	2.81488e-14	TRUE
RUN occupancy (light)	-0.057204	1.7293e-05	0.00546458	TRUE
EAT&DRINK occupancy (dark)	0.11996	3.17407e-23	1.00301e-20	TRUE
EAT&DRINK occupancy (early-dark)	0.157366	7.60106e-39	2.40194e-36	TRUE
EAT&DRINK occupancy (early-light)	-0.129481	9.56144e-27	3.02141e-24	TRUE
EAT&DRINK occupancy (late-dark)	0.093884	7.87275e-15	2.48779e-12	TRUE
EAT&DRINK occupancy (late-light)	-0.010464	0.386574	122.157	FALSE
EAT&DRINK occupancy (light)	-0.008013	0.518368	163.804	FALSE
EAT occupancy (dark)	0.180737	3.10777e-50	9.82056e-48	TRUE
EAT occupancy (early-dark)	0.180244	3.46584e-50	1.0952e-47	TRUE
EAT occupancy (early-light)	-0.04667	0.000107112	0.0338473	TRUE
EAT occupancy (late-dark)	0.167621	8.72865e-44	2.75825e-41	TRUE
EAT occupancy (late-light)	0.05228	1.41675e-05	0.00447692	TRUE
EAT occupancy (light)	0.041337	0.000615999	0.194656	FALSE
AllMeters(lights-on-ratio)	0.200454	3.0335e-62	9.58587e-60	TRUE
BodyMass(lights-on-ratio)	0.106784	7.96233e-19	2.5161e-16	TRUE
Food(lights-on-ratio)	0.164226	5.30504e-41	1.67639e-38	TRUE
KCal_hr(lights-on-ratio)	0.016406	0.173254	54.7482	FALSE
PedMeters(lights-on-ratio)	0.195829	3.30161e-59	1.04331e-56	TRUE
PedSpeed(lights-on-ratio)	0.125736	1.56569e-25	4.94758e-23	TRUE
RQ(lights-on-ratio)	0.114832	4.96035e-21	1.56747e-18	TRUE
VCO2(lights-on-ratio)	0.044223	0.00024747	0.0782005	FALSE
VH2O(lights-on-ratio)	0.046398	0.000202183	0.0638899	FALSE
VO2(lights-on-ratio)	0.01986	0.0992947	31.3771	FALSE
Water(lights-on-ratio)	0.102449	2.92828e-17	9.25335e-15	TRUE
WheelMeters(lights-on-ratio)	-0.032398	0.0174643	5.51872	FALSE
WheelSpeed(lights-on-ratio)	-0.028662	0.0192285	6.07619	FALSE
XBreak(lights-on-ratio)	0.202503	4.60183e-63	1.45418e-60	TRUE
YBreak(lights-on-ratio)	0.219417	1.01355e-73	3.20283e-71	TRUE
ZBreak(lights-on-ratio)	0.171954	7.72857e-44	2.44223e-41	TRUE
REST occupancy (lights-on-ratio)	0.054449	6.41942e-06	0.00202854	TRUE
SLEEP occupancy (lights-on-ratio)	-0.05174	5.07378e-05	0.0160331	TRUE
ACTIVE occupancy (lights-on-ratio)	0.086899	7.79431e-11	2.463e-08	TRUE
RUN occupancy (lights-on-ratio)	0.027477	0.0337817	10.675	FALSE
EAT&DRINK occupancy (lights-on-ratio)	0.184393	2.01392e-51	6.36398e-49	TRUE
EAT occupancy (lights-on-ratio)	0.221697	1.11955e-74	3.53779e-72	TRUE
AllMeters(lights-off-ratio)	-0.124862	3.47442e-25	1.09792e-22	TRUE
BodyMass(lights-off-ratio)	-0.078467	7.40974e-11	2.34148e-08	TRUE
Food(lights-off-ratio)	-0.1209	4.89719e-23	1.54751e-20	TRUE
KCal_hr(lights-off-ratio)	0.177133	6.14021e-49	1.9403e-46	TRUE
PedMeters(lights-off-ratio)	-0.132604	4.56731e-28	1.44327e-25	TRUE
PedSpeed(lights-off-ratio)	0.038125	0.00154743	0.488989	FALSE
RQ(lights-off-ratio)	-0.043591	0.00035579	0.11243	FALSE
VCO2(lights-off-ratio)	0.128913	1.44349e-26	4.56142e-24	TRUE
VH2O(lights-off-ratio)	0.025737	0.0392273	12.3958	FALSE
VO2(lights-off-ratio)	0.175998	2.4582e-48	7.7679e-46	TRUE
Water(lights-off-ratio)	-0.03685	0.00233382	0.737486	FALSE
WheelMeters(lights-off-ratio)	0.155099	2.70834e-30	8.55835e-28	TRUE
WheelSpeed(lights-off-ratio)	0.160163	4.57875e-39	1.44688e-36	TRUE
XBreak(lights-off-ratio)	-0.154665	1.67507e-37	5.29324e-35	TRUE
YBreak(lights-off-ratio)	-0.146739	6.25735e-34	1.97732e-31	TRUE
ZBreak(lights-off-ratio)	-0.043933	0.000387282	0.122381	FALSE
REST occupancy (lights-off-ratio)	-0.138154	2.13656e-30	6.75153e-28	TRUE
SLEEP occupancy (lights-off-ratio)	-0.122362	7.07899e-21	2.23696e-18	TRUE
ACTIVE occupancy (lights-off-ratio)	-0.013653	0.299982	94.7942	FALSE
RUN occupancy (lights-off-ratio)	0.034995	0.00619524	1.95769	FALSE
EAT&DRINK occupancy (lights-off-ratio)	-0.122783	5.58204e-24	1.76392e-21	TRUE
EAT occupancy (lights-off-ratio)	-0.179794	5.08618e-50	1.60723e-47	TRUE
