# Supplementary material for: Automated, high-dimensional evaluation of physiological aging and resilience in outbred mice
Source: eLife. 2022 Apr 11;11:e72664. doi: 10.7554/eLife.72664 (PMC9000950; doi:10.7554/eLife.72664)
Supplement: Supplementary file 2. — Each column represents 1 of the 22 identified clusters. Row 1 indicates cluster number, row 2 indicates the qualitative name assigned to that cluster, and subsequent rows list the features that are included in that cluster. [file elife-72664-supp2.xlsx]

## Sheet: Sheet1
Cluster-0	Cluster-1	Cluster-2	Cluster-3	Cluster-4	Cluster-5	Cluster-6	Cluster-7	Cluster-8	Cluster-9	Cluster-10	Cluster-11	Cluster-12	Cluster-13	Cluster-14	Cluster-15	Cluster-16	Cluster-17	Cluster-18	Cluster-19	Cluster-20	Cluster-21
Time spent eating and drinking	Metabolism ramp up	Sleep and rest pattern	Wheel during high activity	Circadian switching at lights on	Movement during high activity	Food and water intake during active phase	Overall movement	Movement during high activity	High activity pattern	Eating pattern	Wheel during light phase	Eating and drinking during light phase	Circadian switching at lights off	CO2 production	Movement during low activity	Metabolic rate	Respiratory quotient	Z Breaks	Body Mass	Activity in light phase	VH2O
BodyMass(lights-off-ratio)	VO2(lights-off-ratio)	PedMeters(REST)	WheelMeters	AllMeters(early-light)	AllMeters(RUN)	Food	AllMeters	AllMeters(EAT)	ACTIVE occupancy	feeding max interval	WheelMeters(early-light)	AllMeters(light)	AllMeters(late-light)	VCO2	AllMeters(REST)	KCal_hr	RQ	ZBreak	BodyMass	ACTIVE occupancy (early-light)	VH2O
BodyMass(lights-on-ratio)	VO2(early-dark)	PedSpeed(REST)	WheelMeters(ACTIVE)	AllMeters(lights-on-ratio)	PedMeters(RUN)	Food(dark)	AllMeters(ACTIVE)	AllMeters(EAT&DRINK)	ACTIVE occupancy (dark)	feeding max period	WheelMeters(late-light)	EAT occupancy (early-light)	AllMeters(lights-off-ratio)	VCO2(ACTIVE)	AllMeters(SLEEP)	KCal_hr(ACTIVE)	RQ(ACTIVE)	ZBreak(EAT)	BodyMass(ACTIVE)	ACTIVE occupancy (late-light)	VH2O(ACTIVE)
EAT&DRINK occupancy	VH2O(lights-off-ratio)	REST occupancy	WheelMeters(dark)	EAT&DRINK occupancy (early-light)	PedSpeed	Food(early-dark)	AllMeters(dark)	PedMeters(EAT)	ACTIVE occupancy (early-dark)	feeding median interval	WheelMeters(lights-off-ratio)	EAT occupancy (late-light)	Food(lights-off-ratio)	VCO2(early-light)	PedMeters(SLEEP)	KCal_hr(early-light)	RQ(dark)	ZBreak(early-dark)	BodyMass(dark)	ACTIVE occupancy (light)	VH2O(dark)
EAT&DRINK occupancy (dark)	VCO2(lights-off-ratio)	REST occupancy (dark)	WheelMeters(early-dark)	EAT&DRINK occupancy (lights-on-ratio)	PedSpeed(dark)	Food(EAT)	AllMeters(early-dark)	PedMeters(EAT&DRINK)	ACTIVE occupancy (late-dark)	feeding median period	WheelSpeed(early-light)	EAT occupancy (light)	PedMeters(late-light)	VCO2(EAT)	PedSpeed(SLEEP)	KCal_hr(EAT)	RQ(early-dark)	ZBreak(ACTIVE)	BodyMass(early-dark)	ACTIVE occupancy (lights-off-ratio)	VH2O(early-dark)
EAT&DRINK occupancy (early-dark)	KCal_hr(lights-off-ratio)	REST occupancy (early-dark)	WheelMeters(EAT)	Food(early-light)	PedSpeed(early-dark)	Food(EAT&DRINK)	AllMeters(late-dark)	PedSpeed(ACTIVE)	EAT occupancy	feeding num period	WheelSpeed(late-light)	EAT&DRINK occupancy (light)	PedMeters(lights-off-ratio)	VCO2(EAT&DRINK)	XBreak(REST)	KCal_hr(EAT&DRINK)	RQ(early-light)	ZBreak(dark)	BodyMass(early-light)	ACTIVE occupancy (lights-on-ratio)	VH2O(early-light)
EAT&DRINK occupancy (late-dark)	KCal_hr(early-dark)	REST occupancy (early-light)	WheelMeters(EAT&DRINK)	Food(lights-on-ratio)	PedSpeed(RUN)	Food(late-dark)	PedMeters	PedSpeed(EAT)	EAT occupancy (dark)		WheelSpeed(light)	Food(light)	PedSpeed(late-light)	VCO2(late-light)	XBreak(SLEEP)	KCal_hr(late-dark)	RQ(EAT)	ZBreak(late-dark)	BodyMass(EAT)	EAT&DRINK occupancy (late-light)	VH2O(EAT)
Food(REST)	KCal_hr(dark)	REST occupancy (late-dark)	WheelMeters(late-dark)	KCal_hr(lights-on-ratio)	XBreak(RUN)	Food(late-light)	PedMeters(ACTIVE)	PedSpeed(EAT&DRINK)	EAT occupancy (early-dark)		WheelSpeed(lights-off-ratio)	PedMeters(light)	PedSpeed(lights-off-ratio)	VCO2(light)	YBreak(REST)	KCal_hr(late-light)	RQ(EAT&DRINK)	ZBreak(EAT&DRINK)	BodyMass(EAT&DRINK)	EAT&DRINK occupancy (lights-off-ratio)	VH2O(EAT&DRINK)
Food(RUN)		REST occupancy (late-light)	WheelMeters(REST)	PedMeters(early-light)	YBreak(RUN)	Water	PedMeters(dark)		EAT occupancy (late-dark)			PedSpeed(light)	RQ(lights-off-ratio)	VCO2(REST)	YBreak(SLEEP)	KCal_hr(light)	RQ(late-dark)		BodyMass(late-dark)	RUN occupancy (early-light)	VH2O(late-dark)
Food(SLEEP)		REST occupancy (light)	WheelMeters(RUN)	PedMeters(lights-on-ratio)		Water(ACTIVE)	PedMeters(early-dark)		EAT occupancy (lights-off-ratio)			Water(light)	Water(lights-off-ratio)	VCO2(RUN)		KCal_hr(REST)	RQ(late-light)		BodyMass(late-light)	RUN occupancy (late-light)	VH2O(late-light)
Water(EAT)		REST occupancy (lights-on-ratio)	WheelSpeed	PedSpeed(early-light)		Water(dark)	PedMeters(late-dark)		exercising max interval			WheelMeters(light)	XBreak(late-light)	VCO2(SLEEP)		KCal_hr(RUN)	RQ(light)		BodyMass(light)	RUN occupancy (light)	VH2O(light)
Water(REST)		SLEEP occupancy	WheelSpeed(ACTIVE)	PedSpeed(lights-on-ratio)		Water(early-dark)	PedSpeed(late-dark)		exercising max period			XBreak(light)	XBreak(lights-off-ratio)			KCal_hr(SLEEP)	RQ(REST)		BodyMass(REST)	RUN occupancy (lights-off-ratio)	VH2O(REST)
Water(RUN)		SLEEP occupancy (dark)	WheelSpeed(dark)	RQ(lights-on-ratio)		Water(EAT&DRINK)	XBreak		exercising median interval			YBreak(light)	YBreak(late-light)			VO2	RQ(RUN)		BodyMass(RUN)	RUN occupancy (lights-on-ratio)	VH2O(RUN)
Water(SLEEP)		SLEEP occupancy (early-dark)	WheelSpeed(early-dark)	SLEEP occupancy (lights-on-ratio)		Water(late-dark)	XBreak(ACTIVE)		exercising median period			ZBreak(light)	YBreak(lights-off-ratio)			VO2(ACTIVE)	RQ(SLEEP)		BodyMass(SLEEP)		VH2O(SLEEP)
WheelMeters(SLEEP)		SLEEP occupancy (early-light)	WheelSpeed(EAT)	EAT occupancy (lights-on-ratio)		Water(late-light)	XBreak(dark)		exercising num period				ZBreak(late-light)			VO2(dark)
WheelSpeed(SLEEP)		SLEEP occupancy (late-dark)	WheelSpeed(EAT&DRINK)	VCO2(lights-on-ratio)			XBreak(early-dark)		Food(ACTIVE)				ZBreak(lights-off-ratio)			VO2(early-light)
YBreak(EAT)		SLEEP occupancy (late-light)	WheelSpeed(late-dark)	VH2O(lights-on-ratio)			XBreak(EAT)		REST occupancy (lights-off-ratio)							VO2(EAT)
ZBreak(REST)		SLEEP occupancy (light)	WheelSpeed(REST)	VO2(lights-on-ratio)			XBreak(EAT&DRINK)		RUN occupancy							VO2(EAT&DRINK)
ZBreak(RUN)		SLEEP occupancy (lights-off-ratio)	WheelSpeed(RUN)	Water(early-light)			XBreak(late-dark)		RUN occupancy (dark)							VO2(late-dark)
ZBreak(SLEEP)		sleeping max interval		Water(lights-on-ratio)			YBreak		RUN occupancy (early-dark)							VO2(late-light)
		sleeping max period		WheelMeters(lights-on-ratio)			YBreak(ACTIVE)		RUN occupancy (late-dark)							VO2(light)
		sleeping median interval		WheelSpeed(lights-on-ratio)			YBreak(dark)		VCO2(dark)							VO2(REST)
		sleeping median period		XBreak(early-light)			YBreak(early-dark)		VCO2(early-dark)							VO2(RUN)
		sleeping num period		XBreak(lights-on-ratio)			YBreak(EAT&DRINK)		VCO2(late-dark)							VO2(SLEEP)
				YBreak(early-light)			YBreak(late-dark)
				YBreak(lights-on-ratio)
				ZBreak(early-light)
				ZBreak(lights-on-ratio)
